# Supplementary material for: An oral commensal attenuates Pseudomonas aeruginosa-induced airway inflammation and modulates nitrite flux in respiratory epithelium
Source: PubMed Central journal article supplement (PMC10715204; doi:10.1128/spectrum.02198-23), 2023-10-06
Supplement: spectrum.02198-23-s0001.pdf [file spectrum.02198-23-s0001.pdf]

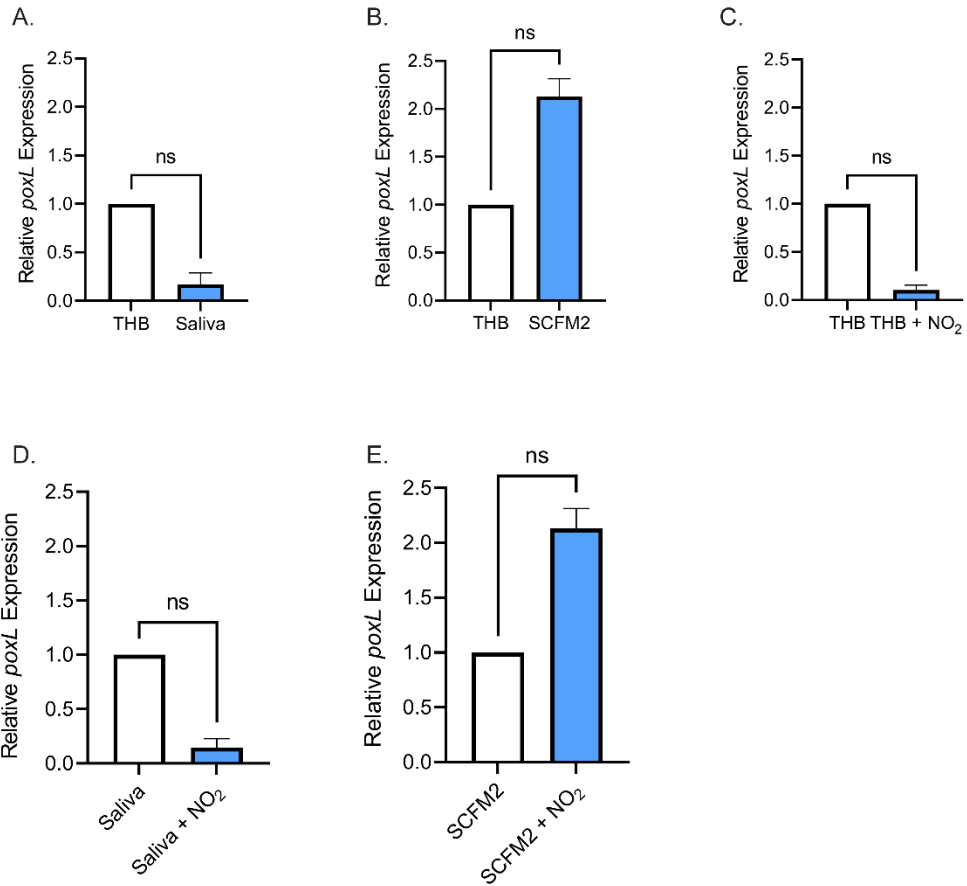

**S1. *poxL* expression is increased in artificial CF sputum.** *poxL* expression was measured via qpcr in THB, artificial saliva (A), and SCFM2 (B). *poxL* expression was also measured in THB, artificial saliva, and SCFM2 with or without nitrite (C-E, respectively). n=3, ns, p>0.05, (Wilcoxon Test).

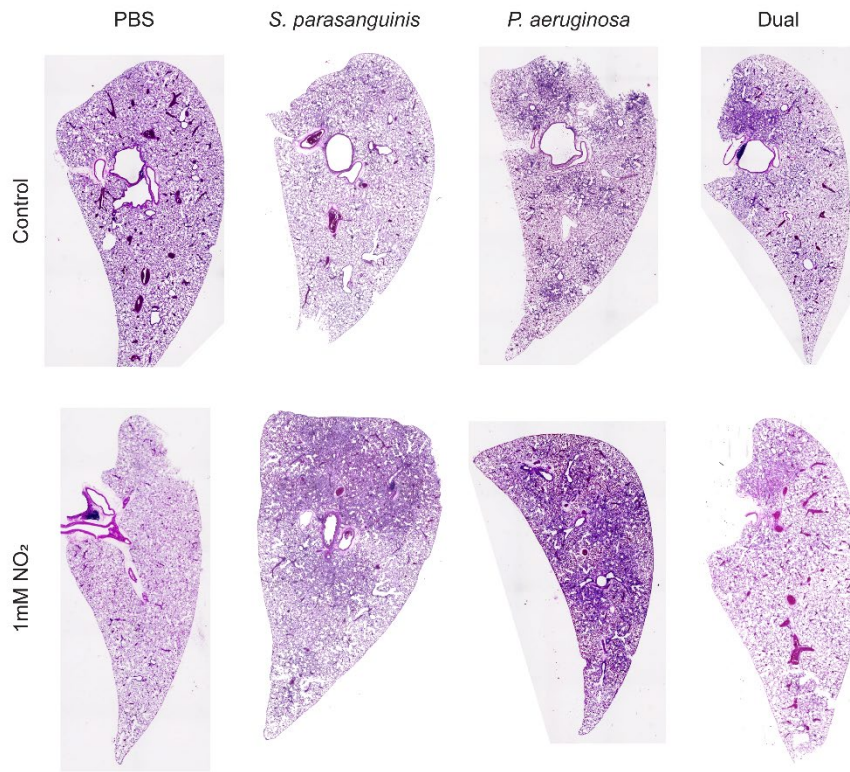

**S2. *S. parasanguinis* attenuates *P. aeruginosa* tissue damage.** Representative images of hematoxylin and eosin staining from the worst scored sections from each infection group.

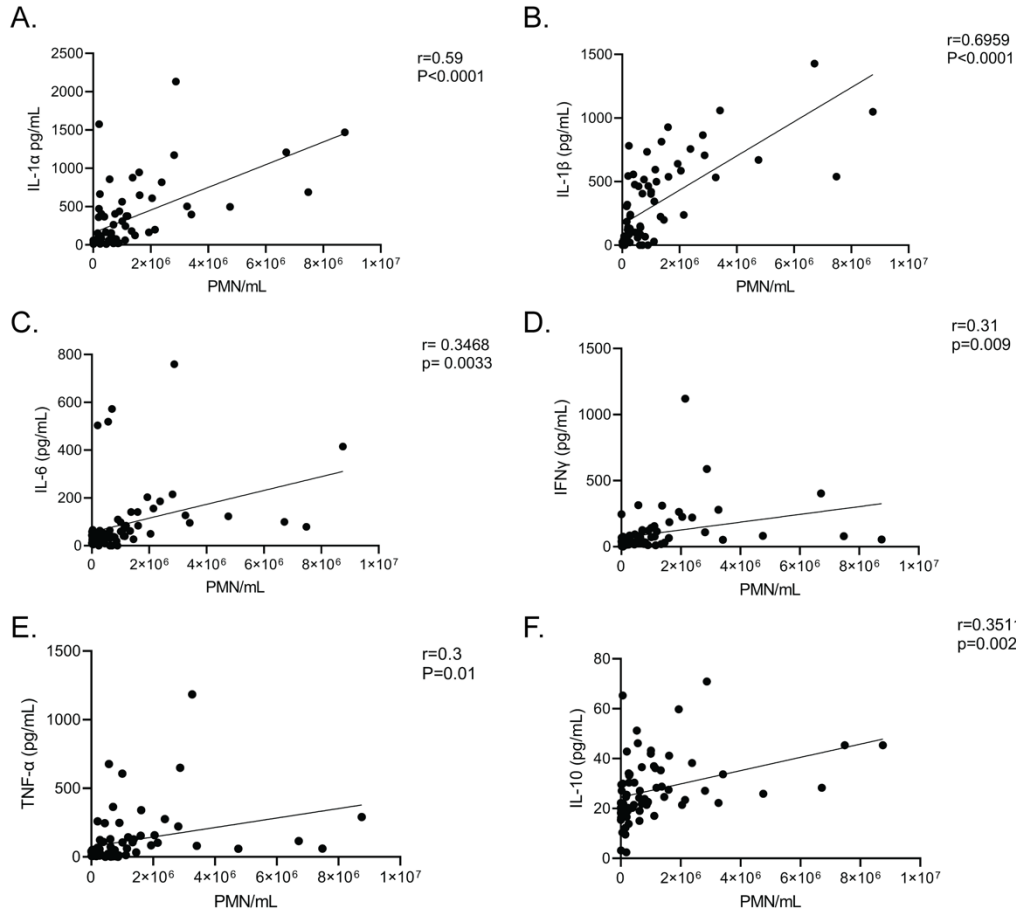

**S3. Cytokines positively correlate with PMN/mL.** Cytokines IL-1 $\alpha$  (A), IL-1 $\beta$  (B), IL-6 (C), IFN- $\gamma$  (D), TNF- $\alpha$  (E), and IL-10 (F) were measured via ELISA from BALF and compared to PMN counts from the same animal.  $n=8-11$ . Significant outliers were identified using the ROUT method and removed. (Correlation).

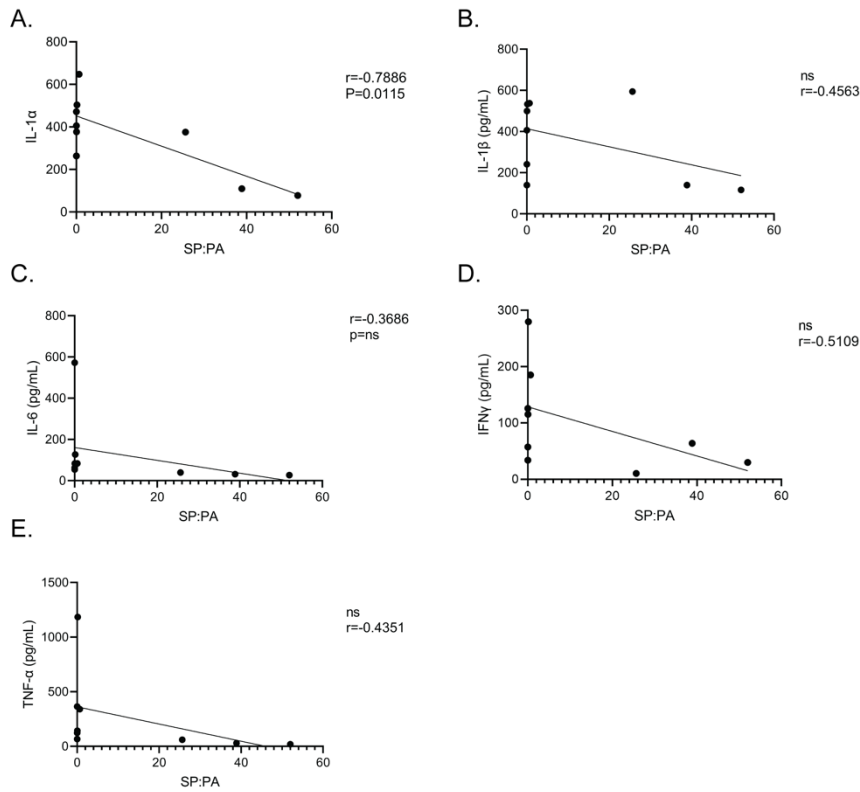

**S4. Inflammatory cytokine production is negatively correlated with increased *S. parasanguinis* CFU in dual-infected animals.** Cytokines IL-1 $\alpha$  (A), IL-1 $\beta$  (B), IL-6 (C), IFN- $\gamma$  (D), and TNF- $\alpha$  (E) were measured via ELISA from BALF and compared to the ratio between *S. parasanguinis* (SP) and *P. aeruginosa* (PA) from the same animal.  $n = 8-11$ . Significant outliers were identified using the ROUT method and removed. (Correlation).

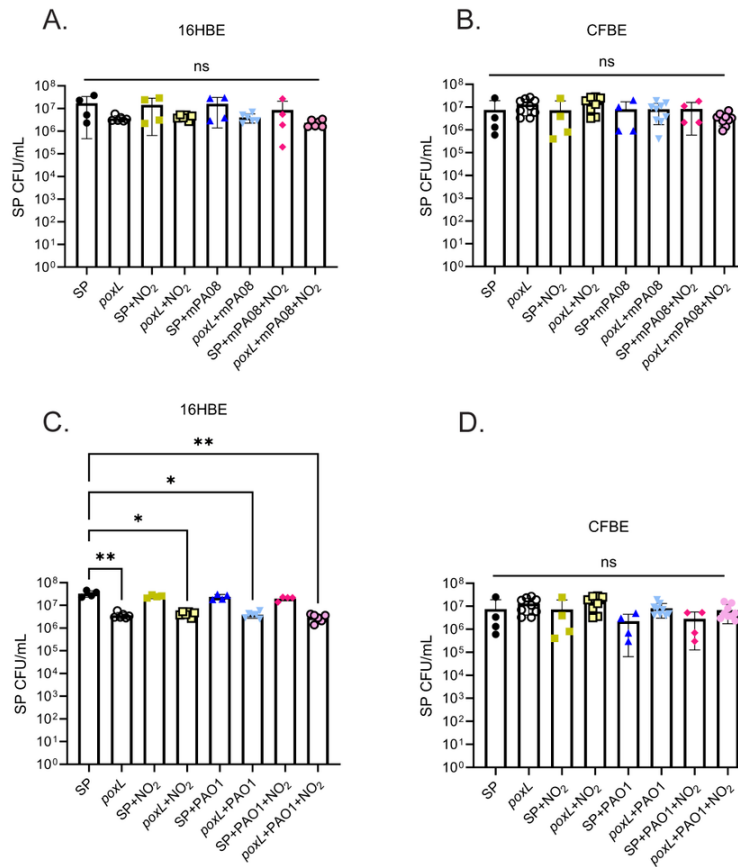

**S5. *S. parasanguinis* colonized bronchial epithelial cells regardless of nitrite or *P. aeruginosa*.** *S. parasanguinis* CFU from A) 16HBE with mPA08, B) CFBE with mPA08, C) 16HBE with PAO1, D) CFBE with PAO1. n=4-9, error bars represent standard deviation. \*, p<0.05, \*\* p<0.01. (One-Way ANOVA, Dunnett's *post hoc* test).

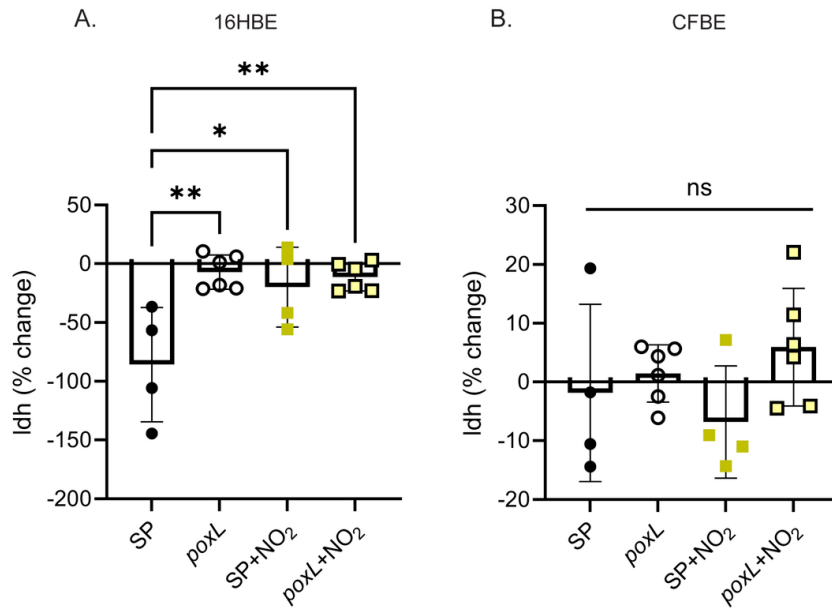

**S6. *S. parasanguinis* does not induce lactate dehydrogenase release.** *S. parasanguinis* or the *poxL* mutant were inoculated on 16HBE (A) or CFBE (B) and Idh was measured before and after incubation and normalized. n=4-6, error bars represent standard deviation. \*, p<0.05, \*\*, p<0.01. (One-Way ANOVA, Dunnett's *post hoc* test).

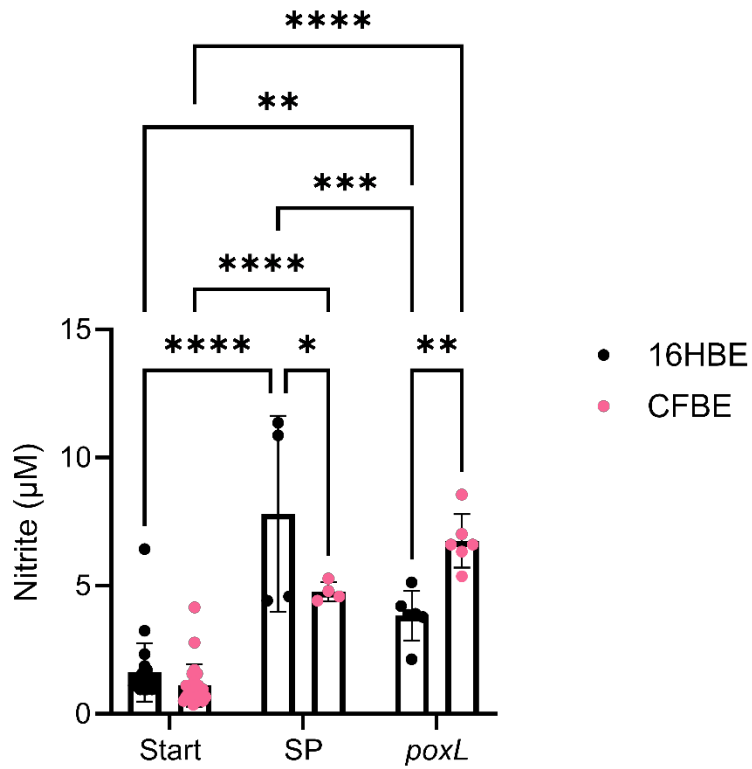

**S7. *S. parasanguinis* increases extracellular nitrite in CF bronchial epithelial cells.**

Extracellular nitrite was measured in 16HBE and CFBE before and after incubation with *S. parasanguinis* or the *poxL* mutant. Error bars represent standard deviation. n=4-24, \*, p<0.05, \*\*, p<0.01, \*\*\* p<0.001, \*\*\*\*, p<0.0001 (Two-Way ANOVA, Tukey's *post hoc* test).
